# Supplementary material
Source: PubMed Central journal article supplement (PMC4670237)
Supplement: NIHMS715946-supplement-1.pdf [file NIHMS715946-supplement-1.pdf]

## Appendix

### **Adding mFOLFOX-6 after neoadjuvant chemoradiation increases pathologic complete response in locally advanced rectal cancer: Results from a multicenter phase 2 trial with four sequential groups.**

#### **List of participating sites**

| <b>Site</b>                                                               | <b>Principal Investigator<br/>(most current is listed last)</b> | <b>Number<br/>enrolled</b> |
|---------------------------------------------------------------------------|-----------------------------------------------------------------|----------------------------|
| University of Southern Florida                                            | Jorge Marcet                                                    | 55                         |
| University of California, San Francisco                                   | Julio Garcia-Aguilar; Madhulika Varma                           | 32                         |
| MedStar Health Research Institute/<br>Washington Hospital Center          | Lee Smith; Anjali Kumar                                         | 30                         |
| St. Joseph Hospital of Orange                                             | Theodore Coutsoftides                                           | 23                         |
| John Muir Health                                                          | Samuel Oommen                                                   | 22                         |
| Washington University                                                     | David Dietz; Steven Hunt                                        | 21                         |
| City of Hope                                                              | Alessio Pigazzi; Julio Garcia-Aguilar; Julian Sanchez, Lily Lai | 21                         |
| University of Vermont                                                     | Neil Hyman; Peter Cataldo                                       | 21                         |
| University of California, Irvine                                          | Michael Stamos                                                  | 15                         |
| University of Chicago                                                     | Alessandro Fichera; Blase Polite                                | 13                         |
| Creighton University Medical Center/<br>Methodist Estabrook Cancer Center | Charles Terner                                                  | 11                         |
| Oregon Health & Science University                                        | Charles Thomas; Daniel Herzig                                   | 11                         |
| Cleveland Clinic                                                          | David Dietz                                                     | 5                          |
| University of Minnesota                                                   | David Rothenberger                                              | 4                          |
| University of Calgary                                                     | W. Donald Buie                                                  | 3                          |
| University of Southern California                                         | Robert Beart                                                    | 2                          |
| Western Pennsylvania Hospital                                             | Thomas Read                                                     | 2                          |
| Salem Hospital                                                            | Tasha McDonald                                                  | 1                          |

**Supplementary Table 1. Treatment Compliance for Preoperative Chemotherapy**

|                                                                  | <b>SG 1</b> | <b>SG 2</b> | <b>SG 3</b> | <b>SG 4</b> | <b>p value</b> |
|------------------------------------------------------------------|-------------|-------------|-------------|-------------|----------------|
| <b>mFOLFOX-6: total number of cycles, mean ± SD</b>              |             | 1·7 +/- 0·7 | 3·5 +/- 1·1 | 5·0 +/- 2·1 | <b>0·0001</b>  |
| <b>mFOLFOX-6: total oxaliplatin, mean ± SD, mg/m<sup>2</sup></b> |             | 143 +/- 62  | 337 +/- 14  | 505 +/- 40  | <b>0·0001</b>  |
| <b>mFOLFOX-6 Initiated</b>                                       |             |             |             |             |                |
| Yes                                                              |             | 58 (87)     | 62 (93)     | 57 (88)     | 0·81           |
| No                                                               |             | 9 (13)      | 5 (7)       | 8 (12)      |                |
| <b>mFOLFOX-6 Deviations</b>                                      |             |             |             |             |                |
| Yes                                                              |             | 3 (5)       | -           | 1 (2)       | 0·28           |
| No                                                               |             | 55 (95)     | 62 (100)    | 56 (98)     |                |
| <b>mFOLFOX-6 Unscheduled Interruptions</b>                       |             |             |             |             |                |
| Yes                                                              |             | 4 (7)       | 22 (35)     | 23 (40)     | <b>0·0001</b>  |
| No                                                               |             | 54 (93)     | 40 (65)     | 34 (60)     |                |
| <b>mFOLFOX-6 Dose Reductions</b>                                 |             |             |             |             |                |
| Yes                                                              |             | 1 (2)       | 8 (13)      | 20 (35)     | <b>0·0001</b>  |
| No                                                               |             | 57 (98)     | 54 (87)     | 37 (65)     |                |

Data are n(%) unless otherwise indicated. p values test the null hypothesis of equal means or proportions across SGs. SG=Study Group.
